# Supplementary material for: Retracted Article: N, S co-doped graphene quantum dots from a single source precursor used for photodynamic cancer therapy under two-photon excitation
Source: Royal Society of Chemistry journal article supplement (doi:10.1039/c4cc09280e), 2014-01-01
Supplement: c4cc09280e1.pdf [file c4cc09280e1.pdf]

# 1 N, S co-doped graphene quantum dots from a single source precursor 2 used for photodynamic cancer therapy under two-photon excitation

3 Rijun Gui,<sup>a</sup> Xifeng Liu,<sup>b</sup> Hui Jin,<sup>a</sup> Zonghua Wang,<sup>\*a</sup> Feifei Zhang,<sup>a</sup> Jianfei Xia,<sup>a</sup> Min Yang,<sup>a</sup> Sai  
4 Bi,<sup>a</sup> and Yanzhi Xia<sup>a</sup>

5 <sup>a</sup> Collaborative Innovation Center for Marine Biomass Fiber, Materials and Textiles of Shandong Province,  
6 Shandong Sino-Japanese Center for Collaborative Research of Carbon Nanomaterials, Laboratory of Fiber  
7 Materials and Modern Textiles, the Growing Base for State Key Laboratory, College of Chemical Science  
8 and Engineering, Qingdao University, Qingdao, Shandong 266071, P.R. China, E-mail address:

9 [wangzonghua@qdu.edu.cn](mailto:wangzonghua@qdu.edu.cn) (Z. Wang), Tel./fax: +86 532 85950873.

10 <sup>b</sup> Department of Orthopedic Surgery, Mayo Clinic, Rochester, MN 55905, USA.

11

## 12 Part S1. Synthesis and characterization of PTPD

13 The synthesis routes of PTPD are based upon the reported method (M. Lan, et al., *J. Am. Chem. Soc.*,  
14 2012, **134**, 6685-6694), as exhibited in Fig. S1a. The according characterizations of PTPD are provided as  
15 below. As illustrated in Fig. S1b, the <sup>1</sup>H-NMR (400 MHz, CDCl<sub>3</sub>, TMS, ppm): δ 0.86-0.89 (t, 3H), 1.23-  
16 1.33 (m, 18H), 1.80 (m, 2H), 3.31 (s, 6H), 3.51-3.56 (m, 2H), 5.14 (s, 2H), 7.35-7.36 (d, *J* = 5 Hz, 1H),  
17 7.39-7.41 (d, *J* = 8 Hz, 1H), 7.49 (s, 1H), 7.61-7.63 (d, *J* = 8 Hz, 2H), 7.69-7.70 (d, *J* = 8 Hz, 2H). The <sup>13</sup>C-  
18 NMR (100 MHz, CDCl<sub>3</sub>, TMS, ppm): δ 14.1, 22.7, 23.0, 26.4, 29.3, 29.5, 29.6, 31.9, 49.6, 63.8, 67.2,  
19 121.7, 126.0, 126.8, 126.9, 133.9, 137.9, 140.8. The MALDI-TOF Mass spectrum *m/z*: Calculated: 386.29;  
20 Found: 386.13. DTPD (yield: 50.0%) GPC: *M<sub>n</sub>* = 6.655 × 10<sup>4</sup> (PDI = 1.161). <sup>1</sup>H-NMR (400 Mz, CD<sub>3</sub>CN-  
21 D<sub>2</sub>O (*v/v* = 1/1), TMS, ppm) δ 0.67-0.69 (br), 1.06 (s,br), 1.60 (s, br), 2.85 (s, br), 3.00 (s, br), 4.56 (s, br),  
22 6.81 (s, br), 7.35-7.37 (dbr), 7.48-7.50 (dbr).

23

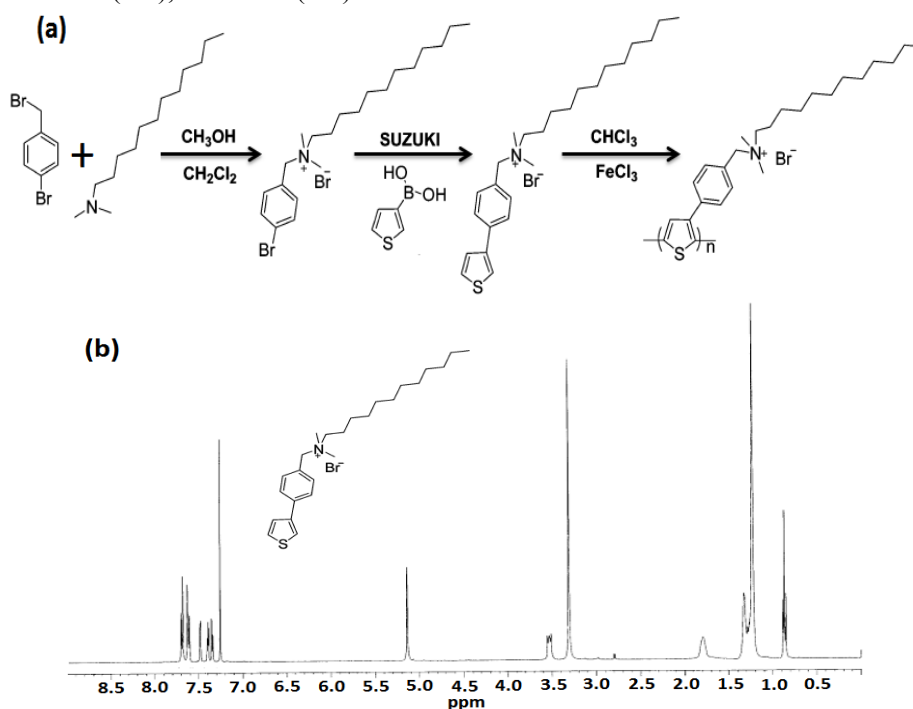

24

25 Fig. S1 (a) The synthetic route and (b) according <sup>1</sup>H-NMR spectra of polythiophene derivative (PTPD).

## 1 Part S2. Synthesis procedures of NS-GQD

2 The synthesis of NS-GQD was performed by a direct hydrothermal treatment of PTPD in basic aqueous  
3 solution. Typically, 20 mg of PTPD was added into 25 mL of NaOH aqueous solution (0.5 mM) to produce  
4 homogeneous mixture solution. Under ultrasonication, the mixture solution was treated for 30 min and then  
5 was transferred into an autoclave, followed by heating at 170 °C for 24 h. After that, the reaction mixture  
6 was cooled to room temperature. The resulting products were collected by filtering to remove the produced  
7 larger particles, using 0.22 μm of membranes. The obtained solution after filtration treatment was dialyzed  
8 against distilled water several times (frequently, in a period of 24 h) to remove residual NaOH. After these  
9 purified procedures, the final sediments (*i.e.* purposed products, NS-GQD) were dispersed in distilled water  
10 for further characterizations and uses in subsequent experiments.

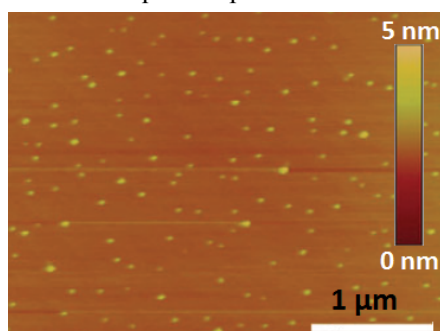

11  
12

**Fig. S2** Atomic force microscope (AFM) images of the as-prepared NS-GQD.

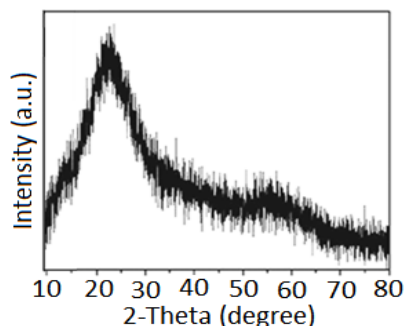

13  
14  
15

**Fig. S3** X-ray diffraction (XRD) patterns of the as-prepared NS-GQD.

16 According to the typical XRD patterns of NS-GQD mentioned above, a sharp diffraction peak appears at  
17 22.5°. Based upon the results from XRD patterns and Raman spectra (Fig. 1c), the sp<sup>2</sup> configuration of NS-  
18 GQD could be further confirmed (L. Liu, et al., *J. Am. Chem. Soc.*, 2011, **133**, 15221. T. López-Ríos, et al.,  
19 *Phys. Rev. Lett.*, 1996, **76**, 4935).

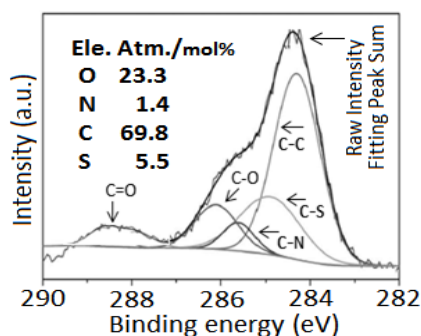

20  
21

**Fig. S4** The de-convolution of high-resolution C1s XPS spectra.

1 The mentioned above high-resolution C1s XPS spectra of NS-GQD indicate five obvious peaks. Based  
2 on the de-convolution treatment, there are peaks at 284.4, 285.0, 285.6 and 286.1 eV, which are assigned to  
3 the C-C, C-S, C-N and C-O bonding, respectively. The contents of N and S elements were respectively  
4 evaluated to be 1.4% and 5.5%, implying the incorporation of N and S into NS-GQD.

5

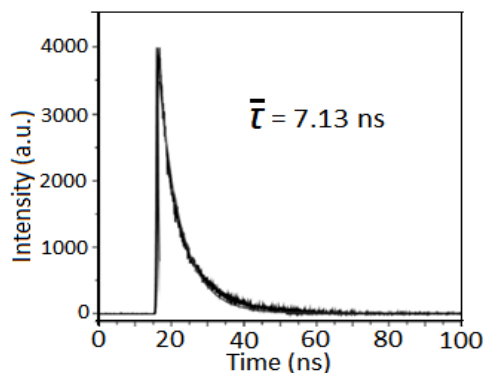

6

7 **Fig. S5** Fluorescence decay curve of NS-GQD, recorded at 675 nm with an excitation of 498 nm.

8

9 **Table S1** Comparison of fluorescence lifetimes and quantum yields of NS-GQD in different atmospheres.

| Atmosphere     | <sup>a</sup> Lifetime (ns) |          |              |          |              |          |                  |       | $\chi^2$ | <sup>b</sup> Quantum yield (%) |
|----------------|----------------------------|----------|--------------|----------|--------------|----------|------------------|-------|----------|--------------------------------|
|                | $\tau_1$ /ns               | $a_1$ /% | $\tau_2$ /ns | $a_2$ /% | $\tau_3$ /ns | $a_3$ /% | $\tau_{ave}$ /ns |       |          |                                |
| O <sub>2</sub> | 0.31                       | 26       | 1.19         | 37       | 7.97         | 47       | 7.126            | 1.012 | 4.7 %    |                                |
| N <sub>2</sub> | 0.43                       | 27       | 1.28         | 34       | 8.04         | 49       | 7.188            | 1.129 | 6.1 %    |                                |
| Air            | 0.44                       | 25       | 1.30         | 37       | 8.07         | 48       | 7.153            | 1.181 | 5.8 %    |                                |

10 Note: <sup>a</sup> Fluorescence lifetime of NS-GQD was measured at 675 nm under an excitation of 498 nm. Average  
11 lifetime ( $\tau_{ave}$ ) was calculated *via* the following equation (M. J. Rueda-Rama, et al., *Chem. Commun.*, 2011,  
12 **47**, 2898; *Analyst*, 2012, **137**, 1500) as below;  $\tau_{ave} = \sum a_i \cdot (\tau_i)^2 / \sum a_i \cdot \tau_i$  ( $i = 1, 2, 3$ ). The fluorescence decay  
13 curves are treated using a standard fitting formula of triplet-exponential decay as below;

$$14 Y = A + B_1 \cdot \exp(-x/\tau_1) + B_2 \cdot \exp(-x/\tau_2) + B_3 \cdot \exp(-x/\tau_3)$$

15 <sup>b</sup> Fluorescence quantum yields of NS-GQD were calculated through comparing the integrated emission of  
16 NS-GQD in solution with a fluorescence dye with the identical optical density at excitation wavelength (W.  
17 Zhang, et al., *Inorg. Chem.*, 2009, **48**, 9723). Quantum yield of rhodamine 6G (R6G in ethanol) is 95%.  
18 Standard calculation of fluorescence quantum yield of NS-GQD was performed by the equation as below;

19  $\Phi_s = \Phi'_f (I_s/I'_f) \cdot (A'_f/A_s) \cdot (n_s/n'_f)$ , where  $\Phi_s$ ,  $I_s$ ,  $A_s$  and  $n_s$  represent the quantum yield, emission peak area,  
20 integrated absorption intensity and refractive indices of NS-GQD, respectively, while  $\Phi'_f$ ,  $I'_f$ ,  $A'_f$  and  $n'_f$   
21 respectively stand for the corresponding parameters of R6G.

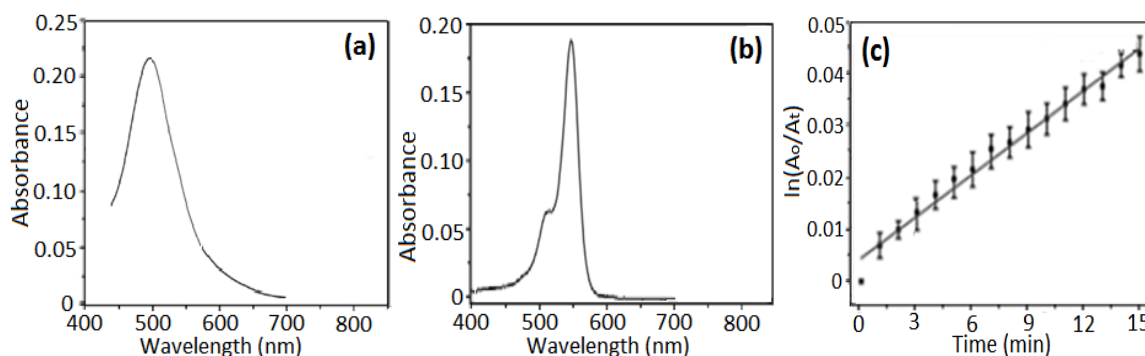

22

1 **Fig. S6** Absorption spectra of NS-GQD (a) and RB (b) in aqueous solution, and (c) the reduction in  
2 absorption of ADPA at 378 nm in the presence of RB. The  $\ln(A_0/A_t)$  was plotted as a function of TPE time  
3 (with an 800 nm fs laser, 6 mW).  
4

### 5 **Part S3. Calculation method of $^1\text{O}_2$ quantum yield**

6 The decomposition rate constants ( $K$ ) of ADPA in the presence of NS-GQD and RB were respectively  
7 determined to be 0.0144 ( $K_{\text{NS-GQD}}$ , Fig. 3b) and 0.0028 ( $K_{\text{RB}}$ , Fig. S5c). The integral areas ( $A$ , ranging from  
8 440 nm to 700 nm) of the absorption spectra of NS-GQD and RB were respectively calculated to be 25.4  
9 ( $A_{\text{NS-GQD}}$ , Fig. S5a) and 8.3 ( $A_{\text{RB}}$ , Fig. S5b). In addition, RB as the standard photosensitizer possesses 0.75  
10 of  $^1\text{O}_2$  quantum yield ( $\Phi_{\text{RB}} = 0.75$ ) in water (L. Xiao, et al., *ACS Nano*, 2011, **5**, 3651). The  $^1\text{O}_2$  quantum  
11 yield of NS-GQD ( $\Phi_{\text{NS-GQD}}$ ) can be calculated using the following formula as below;

$$12 \Phi_{\text{NS-GQD}} = (\Phi_{\text{RB}} * K_{\text{NS-GQD}} * A_{\text{RB}}) / (K_{\text{RB}} * A_{\text{NS-GQD}})$$

13 According to this formula, the  $\Phi_{\text{NS-GQD}}$  can be calculated to be 1.26.  
14

15

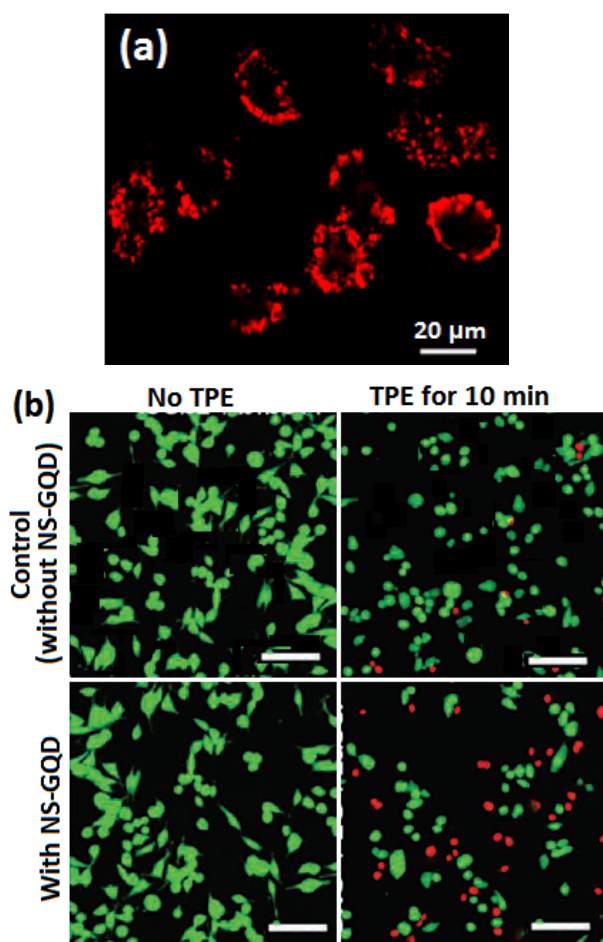

16

17 **Fig. S7** (a) Fluorescence images of HeLa cells labelled with NS-GQD ( $1.0 \text{ mg mL}^{-1}$ ) under TPE (800 nm).

18 (b) Time-dependent fluorescence images of Calcein AM/Ethidium homodimer-1 stained HeLa cells  
19 incubated without NS-GQD (as the control) and with NS-GQD ( $1.0 \text{ mg mL}^{-1}$ ) after TPE with an 800 nm fs  
20 laser (6 mW), irradiated for 0 and 10 min, respectively. Scale bars: 50  $\mu\text{m}$ .  
21

1

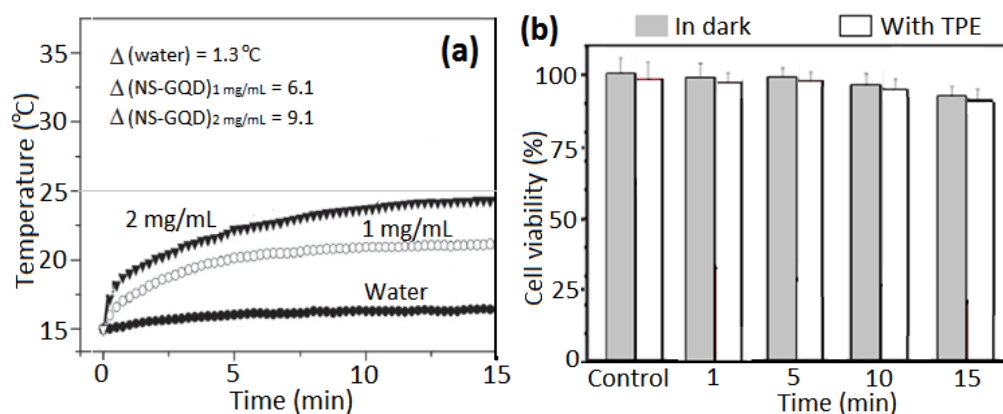

2

3 **Fig. S8** (a) Temperature elevation of aqueous suspension of NS-GQD with different concentrations (1.0  
4 and 2.0 mg mL<sup>-1</sup>) and temperature elevation of water without NS-GQD as a function of irradiation time  
5 (0~15 min) under TPE with an 800 nm fs laser (6 mW), and temperature changes ( $\Delta$ ) of water and NS-  
6 GQD over a period of irradiation time (15 min). These aqueous samples were loaded in a 1 cm  $\times$  1 cm  
7 cuvette. Under a slight stirring (100 rpm), these samples were continuously irradiated with TPE (800 nm, 6  
8 mW) for 0~15 min. (b) The viabilities of HeLa cells incubating in PBS (10 mM, pH 7.4) without (in the  
9 dark) or with the continuous TPE treatment (800 nm, 6 mW) for different times.

10

11
